# Supplementary material
Source: ML conference proceedings conference paper supplement (https://proceedings.mlr.press/v100/koutras20a.html)
Supplement: Supplementary file 2 [file koutras20a-supp.zip]

Archive with 2 entries (2 files):
- Supplementary_document.pdf
- A correct formulation for the Orientation Dynamic Movement Primitives for robot control in the Cartesian space.mp4
